# Supplementary material for: LaF3-coated Li[Li0.2Mn0.56Ni0.16Co0.08]O2 as cathode material with improved electrochemical performance for lithium ion batteries
Source: Royal Society of Chemistry journal article supplement (doi:10.1039/c5ra06243h), 2015-01-01
Supplement: c5ra06243h1.pdf [file c5ra06243h1.pdf]

## Supporting information

### **LaF<sub>3</sub>-coated Li[Li<sub>0.2</sub>Mn<sub>0.56</sub>Ni<sub>0.16</sub>Co<sub>0.08</sub>]O<sub>2</sub> as cathode material with improved electrochemical performance for lithium ion batteries**

Qingliang Xie,<sup>a</sup> Zhibiao Hu,<sup>b</sup> Chenhao Zhao,<sup>b</sup> Shuirong Zhang,<sup>a</sup> and Kaiyu Liu<sup>a, b\*</sup>

\*Corresponding author.

Tel.: +86-13548590751; e-mail: [kaiyuliu67@263.net](mailto:kaiyuliu67@263.net).

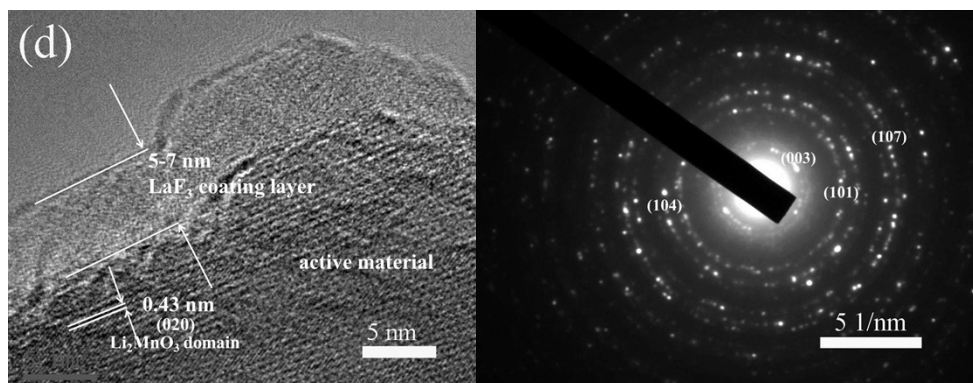

Fig.S1 Corrected HR-TEM image and added SAED (selected area electron diffraction) of 1wt%  $\text{LaF}_3$ -coated  $\text{Li}[\text{Li}_{0.2}\text{Mn}_{0.56}\text{Ni}_{0.16}\text{Co}_{0.08}]\text{O}_2$ .

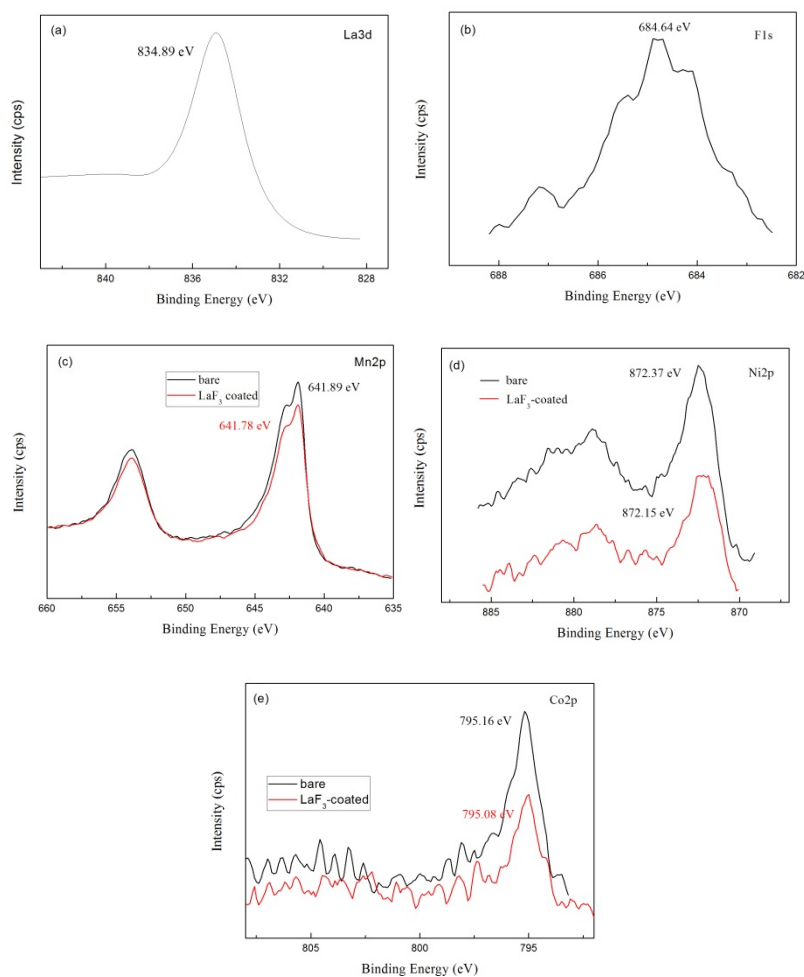

Fig.S2 XPS spectra of bare and 1wt%  $\text{LaF}_3$ -coated  $\text{Li}[\text{Li}_{0.2}\text{Mn}_{0.56}\text{Ni}_{0.16}\text{Co}_{0.08}]\text{O}_2$  (a)La3d, (b) F1s, (c) Mn2p, (d) Ni2p and (e) Co2p.

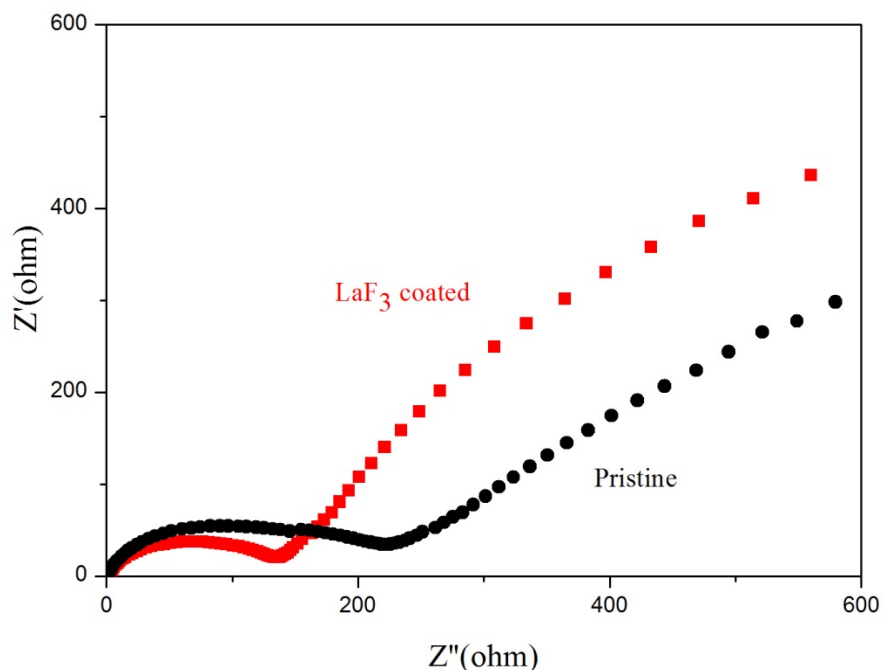

Fig.S3 The original Nyquist plots electrochemical impedance spectroscopy (EIS) of pristine and LaF<sub>3</sub>-coated Li[Li<sub>0.2</sub>Mn<sub>0.56</sub>Ni<sub>0.16</sub>Co<sub>0.08</sub>]O<sub>2</sub> after 3 cycles before charge.
